# Supplementary material for: A simple template-free synthesis of ultrathin Cu2ZnSnS4 nanosheets for highly stable photocatalytic H2 evolution
Source: Royal Society of Chemistry journal article supplement (doi:10.1039/c2jm16515e), 2012-01-01
Supplement: c2jm16515e.pdf [file c2jm16515e.pdf]

## Supporting Information

# A simple template-free synthesis of ultrathin $\text{Cu}_2\text{ZnSnS}_4$ nanosheets for highly stable photocatalytic $\text{H}_2$ evolution

*Lu Wang, Wenzhong Wang\*, Songmei Sun*

State Key Laboratory of High Performance Ceramics and Superfine Microstructure, Shanghai Institute of Ceramics, Chinese Academy of Sciences, 1295 Dingxi Road, Shanghai 200050, China

### **Experimental**

*Preparation of  $\text{Cu}_2\text{ZnSnS}_4$ :* All the reagents were of analytical grade and used without further purification. In a typical synthesis, copper chloride dehydrate ( $\text{CuCl}_2 \cdot 2\text{H}_2\text{O}$ ), zinc chloride ( $\text{ZnCl}_2$ ), and tin chloride dehydrate ( $\text{SnCl}_2 \cdot 2\text{H}_2\text{O}$ ) with molar ratio of 2:1:1 was added in 40 mL absolute alcohol, respectively. Then excessive thiourea was dissolved in the above white suspension. After stirring for 30 minutes, the as-obtained colorless transparent solution was heated at 50 °C for 6 h and at 120 °C for 12 h under vacuum, and then cooled to room temperature naturally. The resulting products were added in oleylamine and heated at 220 °C for 1 h under the  $\text{N}_2$  atmosphere. The resulting suspension was cooled down to room temperature and separated by filtration, washed with absolute alcohol several times to obtain samples with dark brown color.

*Characterization of  $\text{Cu}_2\text{ZnSnS}_4$ :* The X-ray diffraction (XRD) patterns were measured with a D/Max 2250 V diffractometer (Rigaku, Japan) using  $\text{Cu K}\alpha$  ( $\lambda = 1.5406 \text{ \AA}$ ) radiation over the range of  $10^\circ \leq 2\theta \leq 80^\circ$ . The morphologies and microstructures of as-prepared sample were analyzed by the Scanning Electron Microscope (SEM) (JEOL JSM-6700F) and Transmission Electron Microscope (TEM) (JEOL JEM-2100F, accelerating voltage 200 kV). The accurate composition of the sample was obtained by using the Oxford INCA energy dispersive X-ray spectrometer (EDS) attachment of the JEOL JXA-8100 electron probe microanalyzer (EPMA). The optical diffuse reflectance spectrum was conducted on a

UV-Vis spectrophotometer (Hitachi U-3010) using  $\text{BaSO}_4$  as the reference. Nitrogen adsorption-desorption measurements were conducted at 77.35K on a Micromeritics Tristar 3000 analyzer after samples were degassed at 150 °C for 6 h.

*Photocatalytic Reaction:* Photocatalytic reactions were conducted in a gas-closed circulation system. The photocatalyst powder (20 mg) was dispersed by a magnetic stirrer in an aqueous solution (200 ml) containing 0.25 M  $\text{Na}_2\text{SO}_3$  and 0.35 M  $\text{Na}_2\text{S}$  as electron donors in a Pyrex cell with a top window. This suspension was irradiated under UV-visible light from a 500 W Xe lamp. The amount of  $\text{H}_2$  evolved was determined with on-line gas chromatography equipped with a thermal conductivity detector (TCD). Nitrogen was purged through the cell before reaction to remove oxygen.

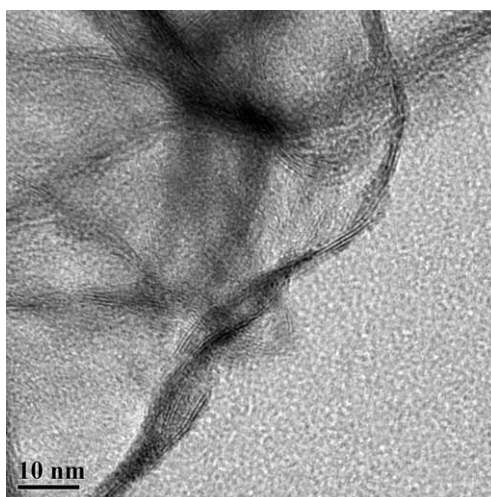

**Figure S1.** TEM image of  $\text{Cu}_2\text{ZnSnS}_4$  with higher magnification

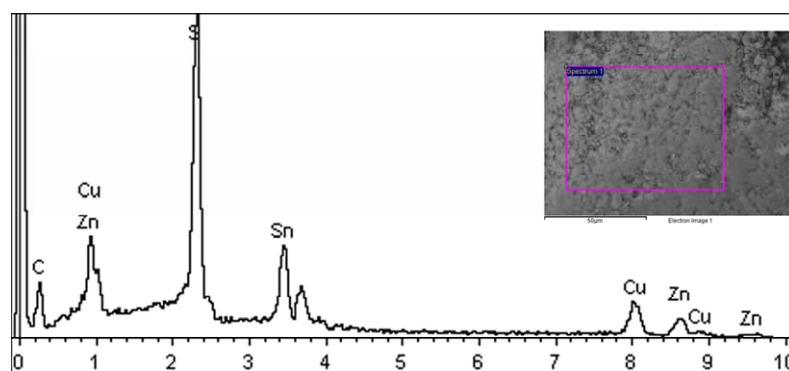

**Figure S2.** Energy dispersive X-ray spectrometer of  $\text{Cu}_2\text{ZnSnS}_4$ .

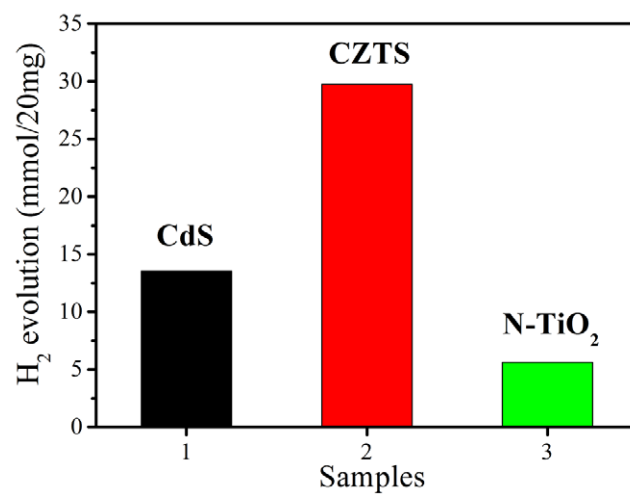

**Figure S3.** The comparison of photocatalytic H<sub>2</sub> evolution over different samples under the same condition.
